# Supplementary material for: ViraMiner: Deep learning on raw DNA sequences for identifying viral genomes in human samples
Source: PubMed Central journal article supplement (PMC6738585; doi:10.1371/journal.pone.0222271), 2019-09-11
Supplement: pone.0222271.s001.pdf [file pone.0222271.s001.pdf]

| <b>Protein Class</b>                  | <b>Count in all data</b> | <b>Count in Test+val set</b> | <b>Average score</b> | <b>Quartiles [25,50,75]</b> | <b>AUROC</b> |
|---------------------------------------|--------------------------|------------------------------|----------------------|-----------------------------|--------------|
| Papillomavirus L1 protein             | 279                      | 48                           | 0.816                | [0.861; 0.985; 0.998]       | 0.984        |
| Anellovirus orf 1                     | 278                      | 52                           | 0.769                | [0.752; 0.976; 0.995]       | 0.99         |
| Papillomavirus helicase               | 123                      | 26                           | 0.803                | [0.754; 0.990; 0.999]       | 0.984        |
| Anellovirus ORF2                      | 91                       | 18                           | 0.738                | [0.545; 0.975; 0.996]       | 0.983        |
| Papillomavirus E2 protein, N terminal | 83                       | 19                           | 0.574                | [0.196; 0.678; 0.943]       | 0.981        |
| Papillomavirus L2 protein             | 66                       | 10                           | 0.797                | [0.964; 0.983; 0.994]       | 0.991        |
| Domain of Unknown function (DUF755)   | 50                       | 10                           | 0.496                | [0.023; 0.487; 0.975]       | 0.964        |
