# Supplementary material for: ViraMiner: Deep learning on raw DNA sequences for identifying viral genomes in human samples
Source: PubMed Central journal article supplement (PMC6738585; doi:10.1371/journal.pone.0222271), 2019-09-11
Supplement: pone.0222271.s002.pdf [file pone.0222271.s002.pdf]

| <b>Viral class</b> | <b>Number of viruses<br/>(before cutting into 300bp)</b> | <b>Number of viruses<br/>(after cutting into 300bp)</b> |
|--------------------|----------------------------------------------------------|---------------------------------------------------------|
| Anelloviridae      | 447                                                      | 1348                                                    |
| Caudovirales       | 634                                                      | 1595                                                    |
| Geminiviridae      | 6                                                        | 24                                                      |
| Genomoviridae      | 63                                                       | 110                                                     |
| Herpesvirales      | 149                                                      | 165                                                     |
| Inoviridae         | 12                                                       | 15                                                      |
| Circoviridae       | 4                                                        | 10                                                      |
| Iridoviridae       | 5                                                        | 8                                                       |
| Microviridae       | 251                                                      | 252                                                     |
| Mimiviridae        | 42                                                       | 67                                                      |
| Papillomaviridae   | 845                                                      | 1045                                                    |
| Parvoviridae       | 37                                                       | 86                                                      |
| Phycodnaviridae    | 55                                                       | 64                                                      |
| Polyomaviridae     | 14                                                       | 48                                                      |
| Poxviridae         | 31                                                       | 50                                                      |
| Retroviridae       | 20                                                       | 24                                                      |
| Others             | 233                                                      | 640                                                     |
